# Supplementary material for: Impulsive decision-making predicts the course of substance-related and addictive disorders
Source: PubMed Central journal article supplement (PMC7501099; doi:10.1007/s00213-020-05567-z), 2020-06-05
Supplement: 213_2020_5567_MOESM1_ESM.pdf [file 213_2020_5567_MOESM1_ESM.pdf]

## **Supplementary material for**

# **Impulsive decision-making predicts the course of substance-related and addictive disorders**

Anja Kräplin<sup>1</sup>, Michael Höfler<sup>1</sup>, Shakoor Pooseh<sup>2,3</sup>, Max Wolff<sup>1,2</sup>, Klaus-Martin Krönke<sup>1</sup>, Thomas Goschke<sup>1</sup>, Gerhard Bühringer<sup>1,4,5</sup>, Michael N. Smolka<sup>2</sup>

<sup>1</sup> Faculty of Psychology, Technische Universität Dresden, Germany

<sup>2</sup> Department of Psychiatry, Technische Universität Dresden, Germany

<sup>3</sup> Freiburg Center for Data Analysis and Modeling, University of Freiburg, Germany

<sup>4</sup> IFT Institut für Therapieforschung, Munich, Germany

<sup>5</sup> Department of Clinical Research, Faculty of Health, University of Southern Denmark

### **Correspondence address**

Anja Kräplin, Work group Addictive Behaviors, Risk Analysis and Risk Management, Faculty of Psychology, Technische Universität Dresden, Chemnitzter Straße 46, D-01187 Dresden, Germany. Email: anja.kraeplin@tu-dresden.de

### **Conflict of interest**

Anja Kräplin, Michael Höfler, Shakoor Pooseh, Max Wolff, Klaus-Martin Krönke, Thomas Goschke, and Michael N. Smolka have no conflicts of interests to declare. Gerhard Bühringer has received unrestricted research grants from the Bavarian State Ministry of Finance (regulatory authority for and operator of the state gambling monopoly), via the Bavarian State Ministry of the Environment and Public Health, the German Federal Ministry of Economics and Technology (regulatory authority for the commercial gaming industry), and from public and private gambling providers.

### **Funding information**

Open Access funding provided by Projekt DEAL. This research was supported by a grant from the Deutsche Forschungsgemeinschaft (DFG) for the Collaborative Research Centre 940 (SFB 940/1, SFB 940/2) and partly supported by grants from the DFG for the Collaborative Research Centre 265 (TRR 265) and the Research Unit 1617 (SM 80/7-1, SM 80/7-2).

### **Compliance with ethical standards**

The study procedures were carried out in accordance with the Declaration of Helsinki. The Institutional Review Board at the Technische Universität Dresden approved the study (EK45022012). All participants were informed about the study and all provided written informed consent.

## Methods

### Recruitment and participants

#### Respondents and non-respondents

From 2013 to 2016, 18.000 inhabitants aged between 19 and 27 randomly taken from the registration office files of Dresden were invited by post to participate in our study and 1.856 responded to the invitation letter (10.3 %). We descriptively compared respondents and non-respondents regarding their birth year and gender. Respondents were fore likely female and more likely from the birth years 1992 to 1995 compared to 1988 to 1991 or 1996 (Table S1).

**Table S1** Gender and birth years of respondents and non-respondents to our study invitation by post.

|                   | <b>Respondents</b> | <b>Non-respondents</b> |
|-------------------|--------------------|------------------------|
|                   | <b>n (%)</b>       | <b>n (%)</b>           |
| <b>Gender</b>     |                    |                        |
| Female            | 1.077 (58.03%)     | 7.760 (48.07%)         |
| <b>Birth year</b> |                    |                        |
| 1988              | 82 (4.4%)          | 668 (4.1%)             |
| 1989              | 70 (3.8%)          | 680 (4.2%)             |
| 1990              | 58 (3.1%)          | 692 (4.3%)             |
| 1991              | 55 (3.0%)          | 695 (4.3%)             |
| 1992              | 362 (19.5%)        | 2.638 (16.3%)          |
| 1993              | 360 (19.4%)        | 2.640 (16.4%)          |
| 1994              | 347 (18.7%)        | 2.652 (16.4%)          |
| 1995              | 319 (17.2%)        | 2.681 (16.6%)          |
| 1996              | 203 (10.9%)        | 2.797 (17.3%)          |

#### Sample size calculation

The sample size for the whole project was estimated using Stata 13 for multiple linear regression with power  $(1 - \beta) = .80$ , significance level  $\alpha = 0.05$ , and five covariates (age, gender, IQ, income, school graduation). We assumed moderate group differences at baseline with  $R^2 = .05$  according previous studies comparing individuals with gambling disorder, alcohol dependence, and Tourette syndrome on measures of executive functions and decision-making (Goudriaan et al. 2005; Goudriaan et al. 2006). The necessary sample size would have been  $N = 235$  in total. Furthermore, we assumed a drop-out rate of 30% during the first funding phase of the project (3 years). The final estimated sample size was 330 with 110 in each group.

## Measurements

### Addictive disorder groups at baseline

**Table S2** Demographic characteristics of the sample at baseline and at one-year follow-up separately for the substance-related disorder (SUD) group, the non-substance-related addictive disorder (ND) group, and the control group.

| <b>Baseline</b>                          | <i>SUD</i>    | <i>ND</i>     | <i>Controls</i>           |
|------------------------------------------|---------------|---------------|---------------------------|
| <i>n</i> =338                            | 100           | 118           | 120                       |
|                                          | <i>M (SD)</i> | <i>M (SD)</i> | <i>M (SD)</i>             |
| Age                                      | 21.8 (1.6)    | 21.8 (1.7)    | 21.9 (1.8)                |
| Intelligence quotient                    | 103.7 (8.9)   | 104.4 (10.1)  | 104.8 (10.4)              |
|                                          | <i>n (%)</i>  | <i>n (%)</i>  | <i>n (%)</i>              |
| Female participants                      | 53 (53.0 %)   | 70 (59.3 %)   | 76 (63.3 %)               |
| Income < 1500 Euro per month             | 75 (75.8 %)   | 92 (77.0 %)   | 89 (75.4 %)               |
| School graduation ‘Abitur’ <sup>1)</sup> | 68 (68.7 %)   | 85 (72.0 %)   | 97 (82.2 %)               |
| In education, pupils, or students        | 72 (72.7 %)   | 87 (73.7 %)   | 87 (73.7 %) <sup>2)</sup> |
| <b>One year follow-up</b>                | <i>SUD</i>    | <i>ND</i>     | <i>CG</i>                 |
| <i>n</i> =312<br>(92% from baseline)     | 93 (93 %)     | 107 (91 %)    | 112 (93 %)                |
|                                          | <i>M (SD)</i> | <i>M (SD)</i> | <i>M (SD)</i>             |
| Age                                      | 21.7 (1.7)    | 21.9 (1.7)    | 21.9 (1.8)                |
| Intelligence quotient                    | 103.7 (9.2)   | 104.3 (10.3)  | 105.1 (10.5)              |
|                                          | <i>n (%)</i>  | <i>n (%)</i>  | <i>n (%)</i>              |
| Female participants                      | 50 (53.8 %)   | 64 (59.8 %)   | 70 (62.5 %)               |
| Income < 1500 Euro per month             | 70 (75.3 %)   | 83 (77.6 %)   | 85 (75.9 %)               |
| School graduation ‘Abitur’ <sup>1)</sup> | 64 (69.6 %)   | 76 (71.0 %)   | 92 (83.6 %)               |
| In education, pupils, or students        | 68(73.9 %)    | 79 (73.8 %)   | 82(74.6 %) <sup>2)</sup>  |

Note: M = Means; SD = standard deviations

1) Abitur is the German school-leaving qualification required for university entrance.

2) Two participants refused to provide information.

## Symptom severity according to groups

**Table S3:** Severity of substance-related and addictive disorders (AD) according to the DSM-5 specifiers at baseline and follow-up (1 year later) separately for the substance use disorder (SUD) group, the non-substance-related addictive disorder (ND) group, and the control group.

| <i>Baseline AD severity according to DSM-5 specifiers</i> |              |              |                 |
|-----------------------------------------------------------|--------------|--------------|-----------------|
|                                                           | <b>SUD</b>   | <b>ND</b>    | <b>Controls</b> |
|                                                           | <b>n=100</b> | <b>n=118</b> | <b>n=120</b>    |
| <b>DSM-5 SUD</b>                                          |              |              |                 |
| Tobacco-related                                           | n=61         | n=0          | n=0             |
| Mild                                                      | 53%          |              |                 |
| Moderate                                                  | 33%          |              |                 |
| Severe                                                    | 14%          |              |                 |
| Alcohol-related                                           | n=55         | n=0          | n=0             |
| Mild                                                      | 84%          |              |                 |
| Moderate                                                  | 11%          |              |                 |
| Severe                                                    | 5%           |              |                 |
| <b>(Adapted) DSM-5 ND</b>                                 |              |              |                 |
| Internet-related                                          | n=0          | n= 101       | n=0             |
| Mild                                                      |              | 61%          |                 |
| Moderate                                                  |              | 31%          |                 |
| Severe                                                    |              | 8%           |                 |
| Gaming-related                                            | n=0          | n=34         | n=0             |
| Mild                                                      |              | 44%          |                 |
| Moderate                                                  |              | 32%          |                 |
| Severe                                                    |              | 24%          |                 |
| Gambling-related                                          | n=0          | n=1          | n=0             |
| Mild                                                      |              | 100%         |                 |
| Moderate                                                  |              | 0%           |                 |
| Severe                                                    |              | 0%           |                 |
| Shopping-related                                          | n=0          | n=0          | n=0             |
| Mild                                                      |              |              |                 |
| Moderate                                                  |              |              |                 |
| Severe                                                    |              |              |                 |

---

*Follow-up (1 year) AD severity according to DSM-5 specifiers*

---

|                           | <b>SUD</b>  | <b>ND</b>    | <b>CG</b>    |
|---------------------------|-------------|--------------|--------------|
|                           | <b>n=93</b> | <b>n=107</b> | <b>n=112</b> |
| <hr/>                     |             |              |              |
| <b>DSM-5 SUD</b>          |             |              |              |
| Tobacco-related           | n=37        | n=2          | n=1          |
| Mild                      | 51%         | 50%          | 0%           |
| Moderate                  | 41%         | 0%           | 100%         |
| Severe                    | 8%          | 50%          | 0%           |
| Alcohol-related           | n=24        | n=10         | n=11         |
| Mild                      | 87%         | 70%          | 73%          |
| Moderate                  | 13%         | 30%          | 27%          |
| Severe                    | 0%          | 0%           | 0%           |
| <hr/>                     |             |              |              |
| <b>(Adapted) DSM-5 ND</b> |             |              |              |
| Internet-related          | n= 10       | n= 53        | n= 7         |
| Mild                      | 60%         | 66%          | 100%         |
| Moderate                  | 30%         | 19%          | 0%           |
| Severe                    | 10%         | 15%          | 0%           |
| Gaming-related            | n=0         | n=10         | n=1          |
| Mild                      |             | 60%          | 100%         |
| Moderate                  |             | 20%          | 0%           |
| Severe                    |             | 20%          | 0%           |
| Gambling-related          | n=0         | n=1          | n=0          |
| Mild                      |             | 100%         |              |
| Moderate                  |             | 0%           |              |
| Severe                    |             | 0%           |              |
| Shopping-related          | n=0         | n=1          | n=2          |
| Mild                      |             | 100%         | 100%         |
| Moderate                  |             | 0%           | 0%           |
| Severe                    |             | 0%           | 0%           |

---

*Note:* multiple symptoms are possible for one person.

---

## Data analyses

### Sample for priors to test the first hypothesis (group differences)

**Table S4** Demographic characteristics of the sample from a previous study (Bernhardt et al. 2017), which was used to estimate the prior distributions.

|                                                                           | <b>Alcohol dependent patients</b> | <b>Healthy controls</b> |
|---------------------------------------------------------------------------|-----------------------------------|-------------------------|
| <b>Number of participants</b>                                             | 114                               | 98                      |
|                                                                           | <i>n (%)</i>                      | <i>n (%)</i>            |
| <b>Female participants</b>                                                | 18 (16.0 %)                       | 17 (17.4 %)             |
|                                                                           | <i>M (SD)</i>                     | <i>M (SD)</i>           |
| <b>Age</b>                                                                | 44.8 (1.6)                        | 43.8 (1.7)              |
|                                                                           | <i>Median (range)</i>             | <i>Median (range)</i>   |
| <b>Alcohol consumption in past year (g ethanol per drinking occasion)</b> | 180 (36-810)                      | 45 (0-135)              |
| <b>Lifetime DSM-5 alcohol use disorder symptoms</b>                       | 8 (3-11)                          | 0 (0-7)                 |

*Note:* M = Means; SD = standard deviations

## Results

**Table S5** Decision-making parameters separately for the substance use disorder (SUD) group, the non-substance-related addictive disorder (ND) group, and the control group.

| <b>Decision-making facet</b>                                   | <b>SUD</b>   | <b>ND</b>    | <b>Controls</b> |
|----------------------------------------------------------------|--------------|--------------|-----------------|
|                                                                | M (SD)       | M (SD)       | M (SD)          |
| <b>Delay discounting <math>\log(k)</math></b>                  | -5.12 (3.12) | -5.71 (3.27) | -5.80 (2.96)    |
| <b>Probability discounting for gains <math>\log(k)</math></b>  | -0.07 (1.24) | 0.17 (1.10)  | 0.15 (0.95)     |
| <b>Probability discounting for losses <math>\log(k)</math></b> | -0.57 (1.18) | -0.53 (1.30) | -0.27 (0.97)    |
| <b>Loss aversion <math>\log(\lambda)</math></b>                | 0.55 (0.76)  | 0.59 (0.81)  | 0.47 (0.74)     |

*Note:* M = Means; SD = standard deviations

**Table S6** Decision-making parameters separately for gender.

| <b>Decision-making facet</b>                                   | <b>Females</b> | <b>Males</b> |
|----------------------------------------------------------------|----------------|--------------|
|                                                                | M (SD)         | M (SD)       |
| <b>Delay discounting <math>\log(k)</math></b>                  | -5.36 (3.18)   | -5.88 (3.03) |
| <b>Probability discounting for gains <math>\log(k)</math></b>  | 0.13 (1.16)    | 0.10 (0.97)  |
| <b>Probability discounting for losses <math>\log(k)</math></b> | -0.55 (1.20)   | -0.30 (1.10) |
| <b>Loss aversion <math>\log(\lambda)</math></b>                | 0.64 (0.76)    | 0.39 (0.77)  |

*Note:* M = Means; SD = standard deviations

**Table S7**

Results of the **reverse Bayesian analyses**<sup>1, 2)</sup> (with posterior, prior, and likelihood distributions) of the group differences in the decision-making parameters at baseline between the substance use disorder (SUD) group or the non-substance-related addictive disorder (ND) group and the control group.

|                                                            |                               | <i>Mean/ Beta<br/>against<br/>controls</i> | <i>95% credibility/<br/>confidence<br/>interval</i> | <i>Probability (%) that the<br/>difference against controls is<br/>in hypothesized direction</i> |
|------------------------------------------------------------|-------------------------------|--------------------------------------------|-----------------------------------------------------|--------------------------------------------------------------------------------------------------|
| Delay discounting $\log(k)$ <sup>1)</sup>                  |                               |                                            |                                                     | $\log(k)$ difference >0                                                                          |
| SUD group                                                  | <i>Posterior</i>              | 0.20                                       | -0.02–0.43                                          | 96%                                                                                              |
|                                                            | <i>Most pessimistic prior</i> | -0.10                                      | -0.37–0.20                                          |                                                                                                  |
|                                                            | <i>Likelihood</i>             | 0.24                                       | -0.02– 0.51                                         |                                                                                                  |
| ND group                                                   | <i>Posterior</i>              | 0.04                                       | -0.01–0.35                                          | 97%                                                                                              |
|                                                            | <i>Most pessimistic prior</i> | 0.30                                       | 0.07–0.60                                           |                                                                                                  |
|                                                            | <i>Likelihood</i>             | 0.08                                       | -0.16– 0.34                                         |                                                                                                  |
| Probability discounting for gains $\log(k)$ <sup>2)</sup>  |                               |                                            |                                                     | $\log(k)$ difference <0                                                                          |
| SUD group                                                  | <i>Posterior</i>              | -0.09                                      | -0.33– 0.15                                         | 77%                                                                                              |
|                                                            | <i>Zero prior</i>             | 0.00                                       | -0.28–0.29                                          |                                                                                                  |
|                                                            | <i>Likelihood</i>             | -0.09                                      | -0.37–0.19                                          |                                                                                                  |
| ND group                                                   | <i>Posterior</i>              | -0.04                                      | -0.22– 0.15                                         | 65%                                                                                              |
|                                                            | <i>Zero prior</i>             | 0.00                                       | -0.28–0.29                                          |                                                                                                  |
|                                                            | <i>Likelihood</i>             | -0.06                                      | -0.33–0.21                                          |                                                                                                  |
| Probability discounting for losses $\log(k)$ <sup>1)</sup> |                               |                                            |                                                     | $\log(k)$ difference <0                                                                          |
| SUD group                                                  | <i>Posterior</i>              | -0.25                                      | -0.36– -0.04                                        | 99%                                                                                              |
|                                                            | <i>Most pessimistic prior</i> | 0.00                                       | -0.28–0.29                                          |                                                                                                  |
|                                                            | <i>Likelihood</i>             | -0.27                                      | -0.54– -0.01                                        |                                                                                                  |
| ND group                                                   | <i>Posterior</i>              | -0.17                                      | -0.35– 0.02                                         | 96%                                                                                              |
|                                                            | <i>Most pessimistic prior</i> | -0.10                                      | -0.38–0.19                                          |                                                                                                  |
|                                                            | <i>Likelihood</i>             | -0.21                                      | -0.48–0.04                                          |                                                                                                  |
| Mixed gambles $\log(\lambda)$ <sup>2)</sup>                |                               |                                            |                                                     | $\log(\lambda)$ difference <0                                                                    |
| SUD group                                                  | <i>Posterior</i>              | 0.07                                       | -0.18–0.31                                          | 24%                                                                                              |
|                                                            | <i>Zero prior</i>             | 0.00                                       | -0.27– 0.61                                         |                                                                                                  |
|                                                            | <i>Likelihood</i>             | 0.09                                       | -0.18–0.36                                          |                                                                                                  |
| ND group                                                   | <i>Posterior</i>              | 0.07                                       | -0.12–0.25                                          | 29%                                                                                              |
|                                                            | <i>Zero prior</i>             | 0.00                                       | -0.27– 0.61                                         |                                                                                                  |
|                                                            | <i>Likelihood</i>             | 0.12                                       | -0.14–0.37                                          |                                                                                                  |

*Note:* Baseline demographic characteristics (age, gender, IQ, income, and school graduation) were included as control variables in all analyses.

1) For the two facets of impulsive decision-making, where we have drawn conclusions for group differences (delay discounting, probability discounting for losses), we have performed a "reverse-Bayes" analysis. Starting from the current prior used for the paper, we reduced the expected value in 0.1 steps until we identified the most pessimistic prior expectation that still allows the conclusion with a probability of 95% (leaving the variance unchanged).

2) For the two facets of impulsive decision-making where we did not draw conclusions for group differences, but the literature suggests weak evidence for group differences (probability discounting for gains, loss aversion), we used a prior with an expected value of zero (leaving the variance unchanged).



**Table S8**

Results of the Bayesian linear regression analyses (with posterior, prior, and likelihood distributions) of the group differences in the decision-making parameters at baseline between the substance use disorder (SUD) group or the non-substance-related addictive disorder (ND) group and the control group as reference group. Results are **without extreme values** according to Stata box plot (values outside the lower quartile - 1.5 inter quartile range (IQR) and the upper quartile + 1.5 IQR).

|                                              |                   | <i>Mean/ Beta<br/>against<br/>controls</i> | <i>95% credibility/<br/>confidence interval</i> | <i>Probability (%) that the<br/>difference from controls is in<br/>hypothesized direction</i> |
|----------------------------------------------|-------------------|--------------------------------------------|-------------------------------------------------|-----------------------------------------------------------------------------------------------|
| Delay discounting $\log(k)$                  |                   |                                            |                                                 | $\log(k)$ difference $>0$                                                                     |
| Controls $n= 5$ excluded                     |                   |                                            |                                                 |                                                                                               |
| SUD group<br>( $n=6$ excluded)               | <i>Posterior</i>  | 0.35                                       | 0.013–0.56                                      | 99%                                                                                           |
|                                              | <i>Prior</i>      | 0.37                                       | 0.10–0.64                                       |                                                                                               |
|                                              | <i>Likelihood</i> | 0.24                                       | -0.02– 0.51                                     |                                                                                               |
| ND group<br>( $n=8$ excluded)                | <i>Posterior</i>  | 0.21                                       | 0.04–0.38                                       | 99%                                                                                           |
|                                              | <i>Prior</i>      | 0.37                                       | 0.10–0.64                                       |                                                                                               |
|                                              | <i>Likelihood</i> | 0.08                                       | -0.16– 0.34                                     |                                                                                               |
| Probability discounting for gains $\log(k)$  |                   |                                            |                                                 | $\log(k)$ difference $<0$                                                                     |
| Controls $n= 8$ excluded                     |                   |                                            |                                                 |                                                                                               |
| SUD group<br>( $n=15$ excluded)              | <i>Posterior</i>  | -0.27                                      | -0.42– 0.12                                     | 99%                                                                                           |
|                                              | <i>Prior</i>      | -0.16                                      | -0.44–0.13                                      |                                                                                               |
|                                              | <i>Likelihood</i> | -0.09                                      | -0.37–0.19                                      |                                                                                               |
| ND group<br>( $n=12$ excluded)               | <i>Posterior</i>  | -0.03                                      | -0.17– 0.10                                     | 69%                                                                                           |
|                                              | <i>Prior</i>      | -0.16                                      | -0.44–0.13                                      |                                                                                               |
|                                              | <i>Likelihood</i> | -0.06                                      | -0.33–0.21                                      |                                                                                               |
| Probability discounting for losses $\log(k)$ |                   |                                            |                                                 | $\log(k)$ difference $<0$                                                                     |
| Controls $n= 8$ excluded                     |                   |                                            |                                                 |                                                                                               |
| SUD group<br>( $n=10$ excluded)              | <i>Posterior</i>  | -0.24                                      | -0.41– -0.08                                    | 99%                                                                                           |
|                                              | <i>Prior</i>      | -0.16                                      | -0.44–0.13                                      |                                                                                               |
|                                              | <i>Likelihood</i> | -0.27                                      | -0.54– -0.01                                    |                                                                                               |
| ND group<br>( $n=15$ excluded)               | <i>Posterior</i>  | -0.17                                      | -0.31– -0.02                                    | 99%                                                                                           |
|                                              | <i>Prior</i>      | -0.16                                      | -0.44–0.13                                      |                                                                                               |
|                                              | <i>Likelihood</i> | -0.21                                      | -0.48–0.04                                      |                                                                                               |
| Mixed gambles $\log(\lambda)$                |                   |                                            |                                                 | $\log(\lambda)$ difference $<0$                                                               |
| Controls $n= 4$ excluded                     |                   |                                            |                                                 |                                                                                               |
| SUD group<br>( $n=7$ excluded)               | <i>Posterior</i>  | -0.05                                      | -0.29–0.19                                      | 65%                                                                                           |
|                                              | <i>Prior</i>      | -0.44                                      | -0.71– -0.17                                    |                                                                                               |
|                                              | <i>Likelihood</i> | 0.09                                       | -0.18–0.36                                      |                                                                                               |
| ND group<br>( $n=6$ excluded)                | <i>Posterior</i>  | -0.14                                      | -0.33–0.04                                      | 93%                                                                                           |
|                                              | <i>Prior</i>      | -0.44                                      | -0.71– -0.17                                    |                                                                                               |
|                                              | <i>Likelihood</i> | 0.12                                       | -0.14–0.37                                      |                                                                                               |

*Note:* Baseline demographic characteristics (age, gender, IQ, income, and school graduation) were included as control variables in all analyses.

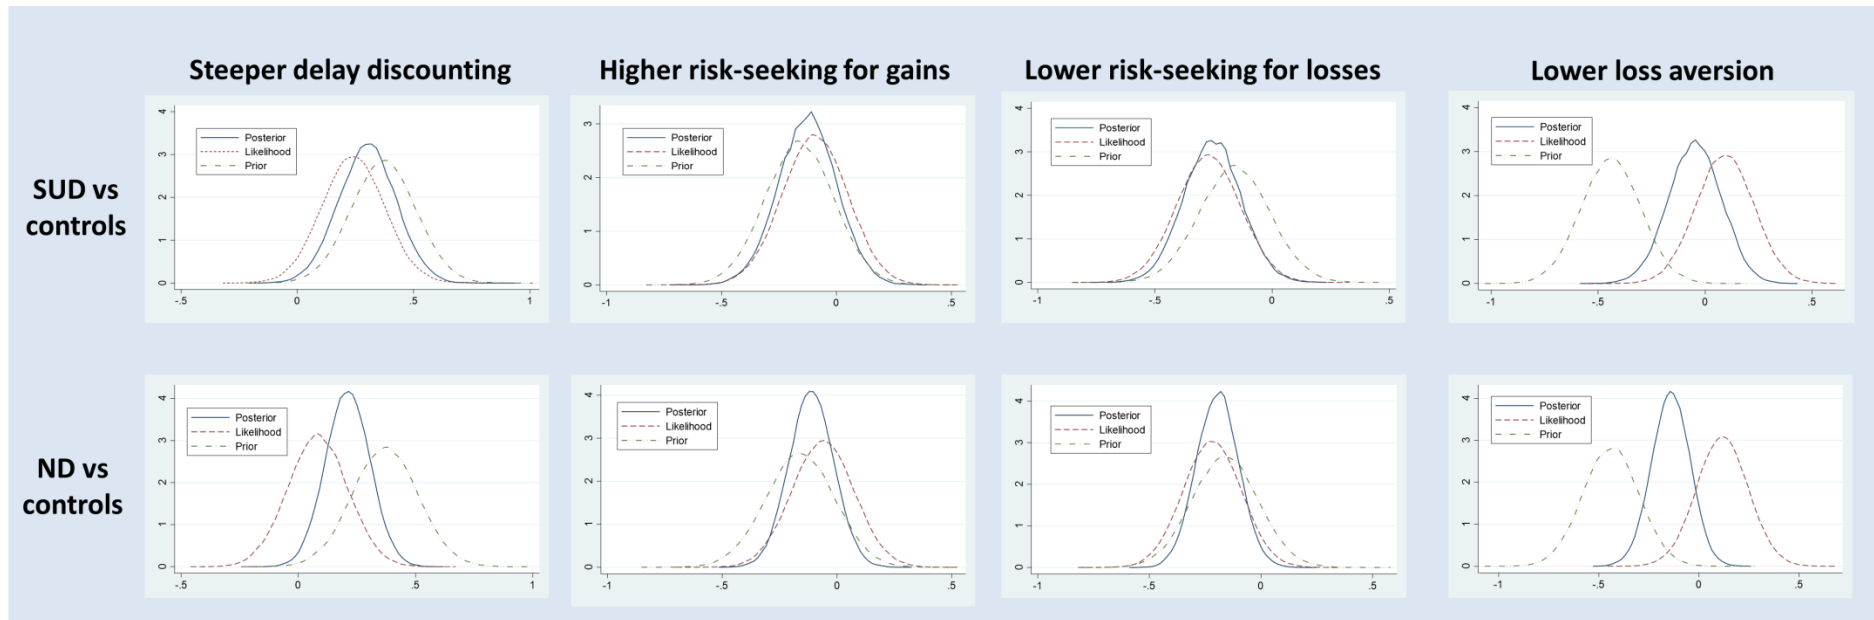

**Fig. S1.** Prior, likelihood, and posterior distributions of the Bayesian linear regression analyses to answer the first research question (group differences). Predictors were the dummy-coded groups (substance use disorder (SUD) group or non-substance-related addictive disorders (ND) group, control group as reference). Outcomes were the logarithmic  $k$  or  $\lambda$  (for mixed gambles) values as indicators of impulsive decision-making. Positive group differences (x axis) indicate that the SUD or ND group had higher values compared to the controls group. We hypothesized that steeper delay discounting (group difference  $> 0$ ), lower probability discounting for gains, lower probability discounting for losses, and decreased loss aversion (group differences  $< 0$  each) characterize individuals with SUD and ND compared to healthy controls. As priors for regression coefficients we used normal distributions with expectations and variances as estimated in a previous study from our lab (Bernhardt et al. 2017).

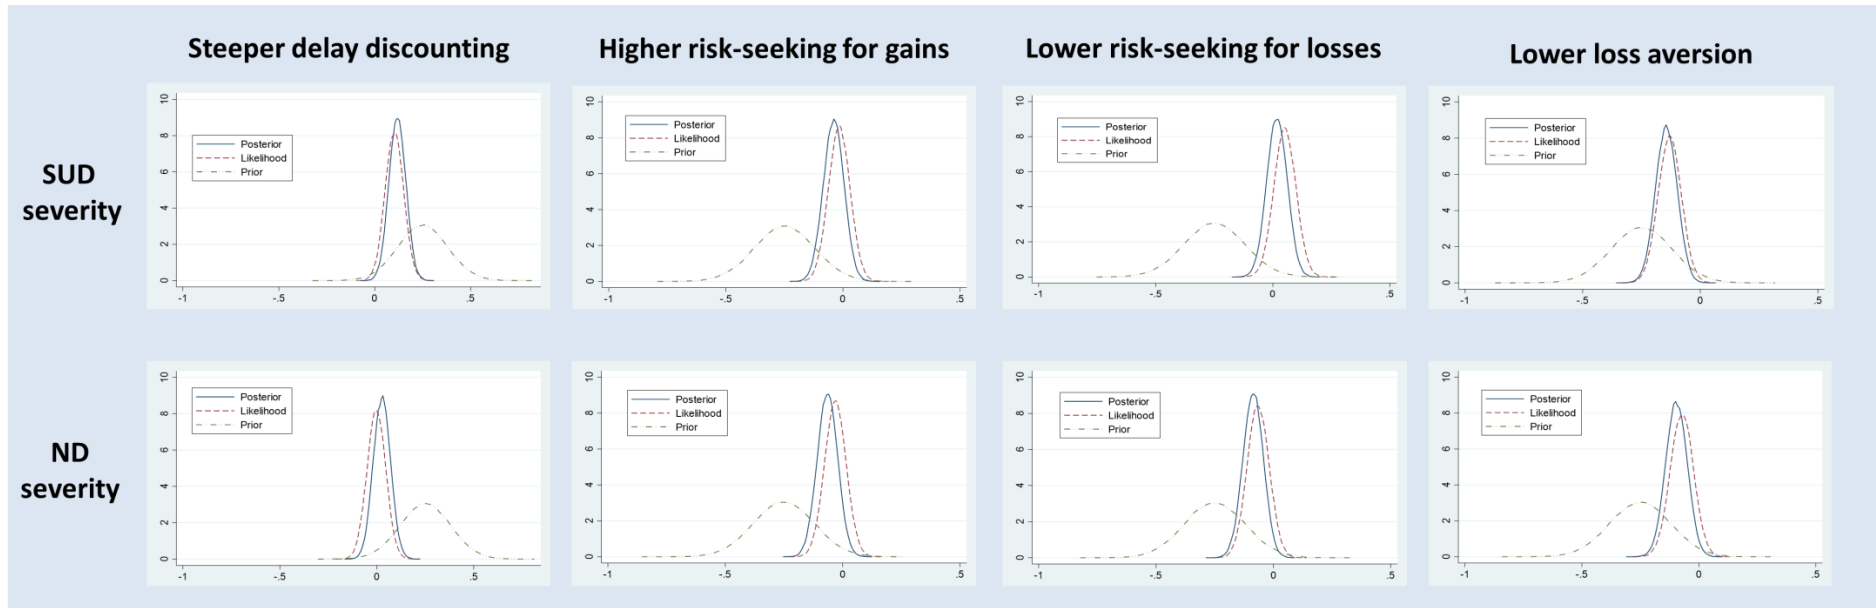

**Fig. S2.** Prior, likelihood, and posterior distributions of the Bayesian linear regression to answer the second research question (change model). Predictors were the logarithmic  $k$  or  $\lambda$  (for mixed gambles) values as indicators of impulsive decision-making. Outcomes were the differences between substance use disorder (SUD) or non-substance-related addictive disorder (ND) severity (number of fulfilled criteria) at follow-up minus baseline. Predictors and outcomes were both z-standardized, yielding standardized regression coefficients that have the same range as correlations (x axis). We hypothesized that steeper delay discounting (correlation  $> 0$ ), lower probability discounting for gains, lower probability discounting for losses, and lower loss aversion (correlations  $< 0$  each) predict increased addictive disorder severity, i.e. an increased number of fulfilled criteria. Concerning the priors, we assumed a probability of 95% that the true association would range between 0 and 0.5 (resp. -0.5 and 0) which corresponds with an expectation of 0.25 (-0.25) and a standard deviation of 0.127 in a normal distribution.

## Supplemental references

- Bernhardt N et al. (2017) Impulsive decision making in young adult social drinkers and detoxified alcohol-dependent patients: a cross-sectional and longitudinal study. *Alcoholism: Clinical and Experimental Research* 41:1794-1807. <https://doi.org/10.1111/acer.13481>
- Goudriaan AE, Oosterlaan J, de Beurs E, van den Brink W (2005) Decision making in pathological gambling: a comparison between pathological gamblers, alcohol dependents, persons with Tourette syndrome, and normal controls. *Cognitive Brain Research* 23:137-151. <https://doi.org/10.1016/j.cogbrainres.2005.01.017>
- Goudriaan AE, Oosterlaan J, de Beurs E, van den Brink W (2006) Neurocognitive functions in pathological gambling: a comparison with alcohol dependence, Tourette syndrome and normal controls. *Addiction* 101:534-547. <https://doi.org/10.1111/j.1360-0443.2006.01380.x>
